# Supplementary material for: Lipid oxidation and aldehyde formation during in vitro gastrointestinal digestion of roasted scallop (Patinopecten yessoensis) – the role of added antioxidant of bamboo leaves
Source: Royal Society of Chemistry journal article supplement (doi:10.1039/d1fo02717d), 2021-01-01
Supplement: d1fo02717d1.pdf [file d1fo02717d1.pdf]

**Table 1S.** Compositions of simulated gastrointestinal digestive juice.

| Compounds                                         | Gastric solution<br>(pH = 2.0)<br>Concentration (mM) | Intestinal solution<br>(pH = 7.0)<br>Concentration (mM) |
|---------------------------------------------------|------------------------------------------------------|---------------------------------------------------------|
| KCl                                               | 6.9                                                  | 6.8                                                     |
| KH <sub>2</sub> PO <sub>4</sub>                   | 0.9                                                  | 0.8                                                     |
| NaHCO <sub>3</sub>                                | 25                                                   | 85                                                      |
| NaCl                                              | 47.2                                                 | 38.4                                                    |
| MgCl <sub>2</sub> (H <sub>2</sub> O) <sub>6</sub> | 0.1                                                  | 0.33                                                    |
| (NH <sub>4</sub> ) <sub>2</sub> CO <sub>3</sub>   | 0.5                                                  | -                                                       |
| CaCl <sub>2</sub>                                 | 0.15                                                 | 0.6                                                     |
| Pepsin                                            | 2000U/mL                                             | -                                                       |
| Pancreatin                                        | -                                                    | 2000U/mL                                                |
| Bile salt                                         | -                                                    | 20                                                      |
